# Supplementary material
Source: ML conference proceedings conference paper supplement (https://proceedings.mlr.press/v119/hoffman20a.html)
Supplement: Supplementary file [file hoffman20a-supp.pdf]

## A. Proofs for convergence of variational inference

We study convergence of  $\Lambda_n$  to  $\Lambda^*$  in terms of the KL divergence from  $p(z)$  to  $q(z|\Lambda_n)$ . Before proving the convergence rates for (stochastic) variational inference, we first derive a useful bound for the KL divergence, which will be used frequently in the proofs to follow.

**Lemma 3.** *The KL divergence between two normal distributions  $p(z)$  and  $q(z|\Lambda_n)$  is upper bounded by their difference in the Frobenius norm:*

$$\begin{aligned} \text{KL}(p(z)||q(z|\Lambda_n)) \\ \leq \frac{1}{2} \|(\Lambda^*)^{-1}\|_2 \cdot \|(\Lambda_n)^{-1}\|_2 \cdot \|\Lambda^* - \Lambda_n\|_F^2. \end{aligned}$$

### Proof of Lemma 3

$$\begin{aligned} \text{KL}(p(z)||q(z|\Lambda_n)) \\ = \frac{1}{2} \left( -\log \frac{|\Lambda_n|}{|\Lambda^*|} + \text{tr}((\Lambda^*)^{-1} \Lambda_n) - d \right) \\ = \frac{1}{2} \left( -\log |(\Lambda^*)^{-1} \Lambda_n| + \text{tr}((\Lambda^*)^{-1} \Lambda_n - I) \right) \end{aligned}$$

Since

$$\log |(\Lambda^*)^{-1} \Lambda_n| \geq \text{tr}(I - \Lambda_n^{-1} \Lambda^*),$$

$$\begin{aligned} \text{KL}(p(z)||q(z|\Lambda_n)) \\ \leq \frac{1}{2} \text{tr}((\Lambda^*)^{-1} \Lambda_n + \Lambda_n^{-1} \Lambda^* - 2I) \\ = \frac{1}{2} \text{tr}((\Lambda^*)^{-1} (\Lambda_n - \Lambda^*) + (\Lambda_n^{-1} (\Lambda^* - \Lambda_n))) \\ = \frac{1}{2} \text{tr}((\Lambda_n^{-1} - (\Lambda^*)^{-1}) (\Lambda^* - \Lambda_n)) \\ \leq \frac{1}{2} \|\Lambda_n^{-1} - (\Lambda^*)^{-1}\|_F \cdot \|\Lambda^* - \Lambda_n\|_F \\ \leq \frac{1}{2} \|(\Lambda^*)^{-1}\|_2 \cdot \|(\Lambda_n)^{-1}\|_2 \cdot \|\Lambda^* - \Lambda_n\|_F^2. \end{aligned}$$

□

### A.1. Proof for “Open-Box” VI Convergence

**Proof of Lemma 1** The update rule in equation 13 can be explicitly expressed as:

$$\begin{aligned} \Lambda_n &= \Lambda_{n-1} - h_{n-1} g(\Lambda_{n-1}) \\ &= \Lambda_{n-1} - \frac{h_{n-1}}{2} (\Lambda_{n-1} - \Lambda^*). \end{aligned}$$

When we take a constant step size  $h_k = h = \frac{1}{2}$ , we can obtain that

$$\Lambda_n = \left(\frac{1}{2}\right)^n \Lambda_0 + \left(1 - \left(\frac{1}{2}\right)^n\right) \Lambda^*.$$

Therefore,

$$\|\Lambda_n - \Lambda^*\|_F = \left(\frac{1}{2}\right)^n \|\Lambda_0 - \Lambda^*\|_F$$

Using the result of Lemma 3, we can obtain that

$$\begin{aligned} & \text{KL}(p(z)||q(z|\Lambda_n)) \\ & \leq \frac{1}{2} \|(\Lambda^*)^{-1}\|_2 \cdot \|(\Lambda_n)^{-1}\|_2 \cdot \|\Lambda^* - \Lambda_n\|_F^2. \end{aligned}$$

By Weyl's theorem, we know that the distance from any eigenvalue of  $\Lambda_n$  to the closest eigenvalue of  $\Lambda^*$  is upper bounded by  $\|\Lambda_n - \Lambda^*\|_2 \leq \|\Lambda_n - \Lambda^*\|_F$ . Therefore,  $\sigma_{\min}(\Lambda_n) \geq \sigma_{\min}(\Lambda^*) - (\frac{1}{2})^n \|\Lambda_0 - \Lambda^*\|_F$ , resulting in the upper bound for the spectral norm of  $\Lambda_n$  that

$$\|(\Lambda_n)^{-1}\|_2 \leq \frac{1}{\sigma_{\min}(\Lambda^*) - (\frac{1}{2})^n \|\Lambda_0 - \Lambda^*\|_F}.$$

Therefore, for any

$$n \geq \log_2 \frac{2}{\sigma_{\min}(\Lambda^*)} \frac{\|\Lambda_0 - \Lambda^*\|_F}{\epsilon},$$

$\text{KL}(p(z)||q(z|\Lambda_n)) \leq \epsilon$ , for any  $\epsilon \leq 1$ . □

## A.2. Proofs for ‘‘Black-Box’’ VI Convergence

**Proof of Theorem 1** We obtain the convergence bound in  $\|\Lambda^* - \Lambda_n\|_F^2$  and then incur Lemma 3 to finish the proof.

**Lemma 4.** *For the stochastic preconditioned gradient descent algorithm described in equation 15 if we take a step size of  $h = \frac{\tilde{\epsilon}}{4\sigma_{\max}^2(\Lambda^*)d\delta^2}$ , we can obtain that when*

$$n \geq \frac{4\sigma_{\max}^2(\Lambda^*)d\delta^2}{\nu\tilde{\epsilon}} \log \frac{2\|\Lambda_0 - \Lambda^*\|_F^2}{\nu\tilde{\epsilon}},$$

$\|\Lambda_n - \Lambda^*\|_F^2 \leq \tilde{\epsilon}$ , with probability  $1 - \nu$ .

Then by Weyl's theorem, we know that the distance from any eigenvalue of  $\Lambda_n$  to the closest eigenvalue of  $\Lambda^*$  is upper bounded by  $\|\Lambda_n - \Lambda^*\|_2 \leq \|\Lambda_n - \Lambda^*\|_F$ . Therefore,  $\sigma_{\min}(\Lambda_n) \geq \sigma_{\min}(\Lambda^*) - \sqrt{\tilde{\epsilon}}$ , resulting in the upper bound for the spectral norm of  $\Lambda_n$  that

$$\|(\Lambda_n)^{-1}\|_2 \leq \frac{1}{\sigma_{\min}(\Lambda^*) - \sqrt{\tilde{\epsilon}}}. \quad (20)$$

Applying equation 20 to Lemma 3, we upper bound the KL divergence by  $\tilde{\epsilon}$ :

$$\text{KL}(p(z)||q(z|\Lambda_n)) \leq \frac{1}{2\sigma_{\min}(\Lambda^*)} \frac{\tilde{\epsilon}}{\sigma_{\min}(\Lambda^*) - \sqrt{\tilde{\epsilon}}}.$$

Choosing  $\tilde{\epsilon} = \frac{\sigma_{\min}^2(\Lambda^*)}{2}\epsilon$  completes the proof that after

$$n \geq 8 \frac{\sigma_{\max}^2(\Lambda^*)\delta^2}{\nu\sigma_{\min}^2(\Lambda^*)} \frac{d}{\epsilon} \cdot \log \frac{4\|\Lambda_0 - \Lambda^*\|_F^2}{\nu\sigma_{\min}^2(\Lambda^*)\epsilon} = \tilde{\mathcal{O}} \left( \frac{\sigma_{\max}^2(\Lambda^*)\delta^2}{\sigma_{\min}^2(\Lambda^*)} \frac{d}{\epsilon} \right).$$

number of iterations,  $\text{KL}(p(z)||q(z|\Lambda_n)) \leq \epsilon$ . □

**Proof of Lemma 4** We first prove the convergence in  $\mathbb{E}\|\Lambda_n - \Lambda^*\|_F^2$  then invoke the Chebychev inequality for the high probability statement.

Since we assumed in equation [14](#) that  $\mathbb{E}[\Delta(\Lambda; \mathcal{D}_n)] = 0$ , and that  $\mathbb{E} \|\Delta(\Lambda; \mathcal{D}_n)\|_F^2 \leq \sigma_{\max}^2(\Lambda^*)d\delta^2$ , for any  $n$ ,

$$\begin{aligned}
 & \mathbb{E} \|\Lambda_n - \Lambda^*\|_F^2 \\
 &= \mathbb{E} \|\Lambda_{n-1} - \Lambda^* - h_{n-1}\hat{g}(\Lambda)\|_F^2 \\
 &= \mathbb{E} \left\| \left(1 - \frac{h_{n-1}}{2}\right) (\Lambda_{n-1} - \Lambda^*) + h_{n-1}\Delta(\Lambda_{n-1}; \mathcal{D}_{n-1}) \right\|_F^2 \\
 &= \left(1 - \frac{h_{n-1}}{2}\right)^2 \mathbb{E} \|\Lambda_{n-1} - \Lambda^*\|_F^2 + 2h_{n-1} \left(1 - \frac{h_{n-1}}{2}\right) \mathbb{E} \langle \Lambda_{n-1} - \Lambda^*, \Delta(\Lambda_{n-1}; \mathcal{D}_{n-1}) \rangle_F + h_{n-1}^2 \mathbb{E} \|\Delta(\Lambda_{n-1}; \mathcal{D}_{n-1})\|_F^2 \\
 &= \left(1 - \frac{h_{n-1}}{2}\right)^2 \mathbb{E} \|\Lambda_{n-1} - \Lambda^*\|_F^2 + h_{n-1}^2 \mathbb{E} \|\Delta(\Lambda_{n-1}; \mathcal{D}_{n-1})\|_F^2 \\
 &\leq \left(1 - \frac{h_{n-1}}{2}\right) \mathbb{E} \|\Lambda_{n-1} - \Lambda^*\|_F^2 + h_{n-1}^2 \mathbb{E} \|\Delta(\Lambda_{n-1}; \mathcal{D}_{n-1})\|_F^2 \\
 &\leq \prod_{i=0}^{n-1} \left(1 - \frac{h_i}{2}\right) \mathbb{E} \|\Lambda_0 - \Lambda^*\|_F^2 + \sum_{j=0}^{n-1} h_j^2 \left( \prod_{i=j+1}^{n-1} \left(1 - \frac{h_i}{2}\right) \right) \mathbb{E} \|\Delta(\Lambda_{j-1}; \mathcal{D}_{j-1})\|_F^2 \\
 &\leq \prod_{i=0}^{n-1} \left(1 - \frac{h_i}{2}\right) \mathbb{E} \|\Lambda_0 - \Lambda^*\|_F^2 + \sum_{j=0}^{n-1} h_j^2 \prod_{i=j+1}^{n-1} \left(1 - \frac{h_i}{2}\right) \sigma_{\max}^2(\Lambda^*)d\delta^2.
 \end{aligned}$$

When we take a constant step size,  $h_k = h$ , the above expression simplifies to:

$$\begin{aligned}
 \mathbb{E} \|\Lambda_n - \Lambda^*\|_F^2 &\leq \left(1 - \frac{h}{2}\right)^n \mathbb{E} \|\Lambda_0 - \Lambda^*\|_F^2 + 2h \left( \left(1 - \frac{h}{2}\right) - \left(1 - \frac{h}{2}\right)^n \right) \sigma_{\max}^2(\Lambda^*)d\delta^2 \\
 &\leq \left(1 - \frac{h}{2}\right)^n \mathbb{E} \|\Lambda_0 - \Lambda^*\|_F^2 + 2h\sigma_{\max}^2(\Lambda^*)d\delta^2.
 \end{aligned} \tag{21}$$

We then invoke the following Chebyshev inequality to obtain the high probability statement:

$$\mathbb{P}(\|\Lambda_n - \Lambda^*\|_F^2 \geq \tilde{\epsilon}) \leq \frac{1}{\tilde{\epsilon}} \mathbb{E} \|\Lambda_n - \Lambda^*\|_F^2.$$

For  $\|\Lambda_n - \Lambda^*\|_F^2 \leq \tilde{\epsilon}$  to hold with  $1 - \nu$  probability, we need  $\|\Lambda_n - \Lambda^*\|_F^2 \leq \nu\tilde{\epsilon}$ .

Choosing  $h = \frac{\nu\tilde{\epsilon}}{4\sigma_{\max}^2(\Lambda^*)d\delta^2}$ , we arrive at our conclusion that  $\|\Lambda_n - \Lambda^*\|_F^2 \leq \tilde{\epsilon}$  with probability  $1 - \nu$ , when

$$n \geq \frac{4\sigma_{\max}^2(\Lambda^*)d\delta^2}{\nu\tilde{\epsilon}} \log \frac{2\|\Lambda_0 - \Lambda^*\|_F^2}{\nu\tilde{\epsilon}},$$

where the log factor can be shaved off by employing a decreasing step size.  $\square$

**Tightness of the bounds** We now demonstrate that the convergence upper bound in Theorem [1](#) is tight up to a logarithmic factor. We first prove that the Frobenius norm bound in Lemma [4](#) instead of a spectral norm bound, is indeed necessary to guarantee the convergence in KL divergence.

To this end, we examine an example of the posterior with the precision matrix  $\Lambda^* = \frac{1}{4}I$ . If the initial distribution has the precision matrix  $\Lambda_0 = I$ , then  $\|\Lambda_0 - \Lambda^*\|_2 = \frac{3}{4}$ . However,

$$\begin{aligned}
 & \text{KL}(p(z) \| q(z | \Lambda_0)) \\
 &= \frac{1}{2} \left( -\log \frac{|\Lambda_0|}{|\Lambda^*|} + \text{tr}((\Lambda^*)^{-1} \Lambda_0) - d \right) \geq d,
 \end{aligned}$$

which can be arbitrarily large as dimension  $d$  increases.

We then use the same posterior of  $\Lambda^* = \frac{1}{4}I$  and take an initial value  $\Lambda_0$  so that  $\|\Lambda_0 - \Lambda^*\|_F^2$  scales inclusively between  $\Omega(1)$  and  $\mathcal{O}(d)$ . Under this mild condition, we demonstrate that the number of iterations,  $n$ , required for  $\|\Lambda_0 - \Lambda^*\|_F^2$  to decrease to  $\|\Lambda_n - \Lambda^*\|_F^2 \leq \frac{1}{2}\|\Lambda_0 - \Lambda^*\|_F^2$  is  $n = \Omega(d)$ .

We first demonstrate that  $\mathbb{E}\|\Delta(\Lambda; \mathcal{D}_n)\|_F^2 = \Omega(d)$  for minibatch size  $|\mathcal{D}_n| = \mathcal{O}(d)$ . From Section 4.3 we know that

$$\begin{aligned} & \mathbb{E}\|\Delta(\Lambda; \mathcal{D}_n)\|_F^2 \\ &= \frac{1}{|\mathcal{D}_n|} \mathbb{E}_{z \sim q} \left[ \|v(\Lambda; z) - \mathbb{E}_{\hat{z} \sim q} [v(\Lambda; \hat{z})]\|_F^2 \right] \\ &= \frac{1}{2|\mathcal{D}_n|} (\text{tr}(\Lambda - \Lambda^*))^2 - \frac{1}{4|\mathcal{D}_n|} \|\Lambda - \Lambda^*\|_F^2 \\ &+ \frac{1}{|\mathcal{D}_n|} \left( \frac{1}{8} \|I - \Lambda^* \Lambda^{-1}\|_F^2 + \frac{1}{16} (\text{KL}(q(z|\Lambda)\|p(z)))^2 \right) \cdot \left( (\text{tr}(\Lambda))^2 + \text{tr}(\Lambda^2) \right). \end{aligned}$$

Since

$$\|\Lambda - \Lambda^*\|_F \leq \|\Lambda\|_2 \cdot \|I - \Lambda^{-1} \Lambda^*\|_F,$$

we employ Weyl's theorem and obtain that

$$\begin{aligned} \|I - \Lambda^{-1} \Lambda^*\|_F &\geq \frac{\|\Lambda - \Lambda^*\|_F}{\sigma_{\max}(\Lambda)} \\ &\geq \frac{\|\Lambda - \Lambda^*\|_F}{\sigma_{\max}(\Lambda^*) + \|\Lambda - \Lambda^*\|_F} = \Omega(1). \end{aligned}$$

Therefore,  $\mathbb{E}\|\Delta(\Lambda; \mathcal{D}_n)\|_F^2 = \Omega(1)$  for  $|\mathcal{D}_n| = \mathcal{O}(d)$  and for  $\|\Lambda - \Lambda^*\|_F = \Omega(1/d)$  and  $\|\Lambda - \Lambda^*\|_F^2 = \mathcal{O}(d)$ .

We then analyze number of steps  $n$  required for  $\|\Lambda_n - \Lambda^*\|_F^2 \leq \frac{1}{2} \|\Lambda_0 - \Lambda^*\|_F^2$ . In the update rule of equation 15,

$$\begin{aligned} \Lambda_n &= \Lambda_{n-1} - h_{n-1} \hat{g}(\Lambda_{n-1}) \\ &= \Lambda_{n-1} - \frac{h_{n-1}}{2} (\Lambda_{n-1} - \Lambda^*) + h_{n-1} \Delta(\Lambda_{n-1}; \mathcal{D}_{n-1}). \end{aligned}$$

Hence

$$\begin{aligned} \Lambda_n - \Lambda^* &= \left(1 - \frac{h_{n-1}}{2}\right) (\Lambda_{n-1} - \Lambda^*) + h_{n-1} \Delta(\Lambda_{n-1}; \mathcal{D}_{n-1}) \\ &= \prod_{i=0}^{n-1} \left(1 - \frac{h_i}{2}\right) (\Lambda_0 - \Lambda^*) + \sum_{j=0}^{n-1} h_j \prod_{i=j+1}^{n-1} \left(1 - \frac{h_i}{2}\right) \Delta(\Lambda_j; \mathcal{D}_j). \end{aligned}$$

Since  $\mathcal{D}_n$  are sampled in an i.i.d. fashion and that  $\mathbb{E}[\Delta(\Lambda; \mathcal{D}_n)] = 0$  from assumption 14,

$$\mathbb{E}\|\Lambda_n - \Lambda^*\|_F^2 = \prod_{i=0}^{n-1} \left(1 - \frac{h_i}{2}\right)^2 \mathbb{E}\|\Lambda_0 - \Lambda^*\|_F^2 + \sum_{j=0}^{n-1} h_j^2 \prod_{i=j+1}^{n-1} \left(1 - \frac{h_i}{2}\right)^2 \mathbb{E}\|\Delta(\Lambda_j; \mathcal{D}_j)\|_F^2.$$

Since  $\mathbb{E}\|\Delta(\Lambda; \mathcal{D}_n)\|_F^2 = \Omega(d)$ , to have that  $\|\Lambda_n - \Lambda^*\|_F^2 \leq \frac{1}{2} \|\Lambda_0 - \Lambda^*\|_F^2$  with a constant probability, we must require

$$\sum_{j=0}^{n-1} h_j^2 \prod_{i=j+1}^{n-1} \left(1 - \frac{h_i}{2}\right)^2 = \mathcal{O}\left(\frac{1}{d}\right),$$

which implies that  $h_j = \mathcal{O}\left(\frac{1}{d}\right)$ ,  $\forall j = 0, \dots, n-1$ . On the other hand, to achieve  $\|\Lambda_n - \Lambda^*\|_F \leq \frac{1}{2} \|\Lambda_0 - \Lambda^*\|_F$ , we also need

$$\prod_{i=0}^{n-1} \left(1 - \frac{h_i}{2}\right) \|\Lambda_0 - \Lambda^*\|_F \leq \frac{1}{2} \|\Lambda_0 - \Lambda^*\|_F,$$

which implies that

$$\begin{aligned} \sum_{i=0}^{n-1} h_i &\geq \sum_{i=0}^{n-1} \left( \left(1 - \frac{h_i}{2}\right)^{-1} - 1 \right) \\ &\geq \sum_{i=0}^{n-1} \log \left( \left(1 - \frac{h_i}{2}\right)^{-1} \right) \\ &\geq \log \frac{\|\Lambda_0 - \Lambda^*\|_F}{\|\Lambda_n - \Lambda^*\|_F} = \log(2). \end{aligned}$$

Since  $h_j = \mathcal{O}\left(\frac{1}{d}\right), \forall j$ , we need  $n = \Omega(d)$  for convergence.  $\square$

## B. Proofs for convergence of Langevin algorithm

**Proof of Lemma 1** Before proving Lemma 1, we first make the assumptions explicit. We are interested in generating samples from  $p(\theta) \propto \exp(-U(\theta))$ , where  $U(\theta)$  is  $L$ -Lipschitz smooth and  $m$ -strongly convex. We further assume, without loss of generality, that  $U$  has a fixed point at the origin 0:  $\nabla U(0) = 0$ .

To prove Lemma 1, we first analyze equation 3 as a discretization scheme of the Langevin diffusion of equation 4. Within each iteration, the ULA update 3 is effectively integrating the following dynamics:

$$\begin{aligned} d\theta_t &= \nabla \log p(\theta_n) dt + \sqrt{2} dW_t \\ &= \nabla \log p(\theta_t) dt + \sqrt{2} dW_t + (\nabla \log p(\theta_n) - \nabla \log p(\theta_t)) dt, \end{aligned} \quad (22)$$

for  $t \in [n\eta, (n+1)\eta]$ .

We then analyze the time derivative of the KL divergence  $\text{KL}(q_t \| p)$  within each step:

$$\begin{aligned} \frac{d}{dt} \text{KL}(q_t \| p) &= -\mathbb{E} \left\langle \nabla \log \frac{q_t(\theta_t)}{p(\theta_t)}, \nabla \log \frac{q_t(\theta_t)}{p(\theta_t)} + (\nabla \log p(\theta_n) - \nabla \log p(\theta_t)) \right\rangle \\ &= -\mathbb{E} \left\| \nabla \log \frac{q_t(\theta_t)}{p(\theta_t)} \right\|^2 + \mathbb{E} \left\langle \nabla \log \frac{q_t(\theta_t)}{p(\theta_t)}, \nabla \log p(\theta_t) - \nabla \log p(\theta_n) \right\rangle, \end{aligned} \quad (23)$$

where the expectation is taken with respect to the joint distribution of  $\theta_t$  and  $\theta_n$ . For the second term in equation 23 we invoke Young's inequality to bound:

$$\begin{aligned} \mathbb{E} \left\langle \nabla \log \frac{q_t(\theta_t)}{p(\theta_t)}, \nabla \log p(\theta_t) - \nabla \log p(\theta_n) \right\rangle &\leq \frac{1}{2} \mathbb{E} \left\| \nabla \log \frac{q_t(\theta_t)}{p(\theta_t)} \right\|^2 + \frac{1}{2} \mathbb{E} \|\nabla \log p(\theta_t) - \nabla \log p(\theta_n)\|^2 \\ &= \frac{1}{2} \mathbb{E} \left\| \nabla \log \frac{q_t(\theta_t)}{p(\theta_t)} \right\|^2 + \frac{1}{2} \mathbb{E} \|\nabla U(\theta_t) - \nabla U(\theta_n)\|^2. \end{aligned}$$

Since potential  $U$  is  $L$ -Lipschitz smooth,  $\|\nabla U(\theta_t) - \nabla U(\theta_n)\|^2 \leq L^2 \|\theta_t - \theta_n\|^2$ . Also note that we have set  $\nabla U(0) = 0$ . Hence

$$\begin{aligned} \frac{1}{2} \mathbb{E} \|\nabla U(\theta_t) - \nabla U(\theta_n)\|^2 &\leq \frac{L^2}{2} \mathbb{E} \|\theta_t - \theta_n\|^2 \\ &= \frac{L^2}{2} \mathbb{E} \left\| -(t - \eta n) \nabla U(\theta_n) + \sqrt{2} (W_t - W_{\eta n}) \right\|^2 \\ &= \frac{L^2 (t - \eta n)^2}{2} \mathbb{E}_{\theta \sim q_n} [\|\nabla U(\theta)\|^2] + L^2 d (t - \eta n) \\ &\leq \frac{L^4 \eta^2}{2} \mathbb{E}_{\theta \sim q_n} [\|\theta\|^2] + L^2 d \eta \end{aligned}$$

Applying this result to equation 23, we obtain an upper bound for  $\frac{d}{dt} \text{KL}(q_t \| p)$  within each iteration:

$$\frac{d}{dt} \text{KL}(q_t \| p) \leq -\frac{1}{2} \mathbb{E} \left\| \nabla \log \frac{q_t(\theta_t)}{p(\theta_t)} \right\|^2 + \frac{L^4 \eta^2}{2} \mathbb{E}_{\theta \sim q_n} [\|\theta\|^2] + L^2 d \eta. \quad (24)$$

Since function  $U$  is  $m$ -strongly convex, we obtain the following log-Sobolev inequality from the Bakry–Emery criterion (see e.g., Bakry & Emery 1985)

$$\mathbb{E}_{\theta \sim q_t} \left[ \left\| \nabla \log \frac{q_t(\theta)}{p(\theta)} \right\|^2 \right] \geq 2m \text{KL}(q_t \| p).$$

Therefore,

$$\frac{d}{dt} \text{KL}(q_t \| p) \leq -m \text{KL}(q_t \| p) + \frac{L^4 \eta^2}{2} \mathbb{E}_{\theta \sim q_n} [\|\theta\|^2] + L^2 d \eta. \quad (25)$$

We prove in the Lemma 5 below that  $\mathbb{E}_{\theta \sim q_n} [\|\theta\|^2] \leq \frac{4d}{m}$ .

**Lemma 5.** For step size  $\eta \leq \frac{1}{L}$ , and for  $q_n$  following the update of equation 3  $\forall n > 0$ ,  $\mathbb{E}_{\theta \sim q_n} [\|\theta\|^2] \leq \frac{4d}{m}$ .

Plugging this bound into equation 25, we obtain:

$$\frac{d}{dt} \text{KL}(q_t \| p) \leq -m \left( \text{KL}(q_t \| p) - \left( 2 \frac{L^4}{m^2} \eta^2 + \frac{L^2}{m} \eta \right) d \right). \quad (26)$$

Invoking Grönwall's inequality, we obtain:

$$\begin{aligned} \text{KL}(q_n \| p) &\leq e^{-m\eta n} \text{KL}(q_{n-1} \| p) + \left( 2 \frac{L^4}{m^2} \eta^2 + \frac{L^2}{m} \eta \right) d \\ &\leq e^{-m\eta n} \text{KL}(q_0 \| p) + \left( 2 \frac{L^4}{m^2} \eta^2 + \frac{L^2}{m} \eta \right) d. \end{aligned} \quad (27)$$

This means that  $\text{KL}(q_n \| p)$  is converging exponentially to the level of discretization error.

To obtain an accuracy guarantee of  $\epsilon$ , we choose a step size of  $\eta = \frac{m}{4L^2} \frac{\epsilon}{d}$  and have (for  $\epsilon \leq d$ ):

$$\text{KL}(q_n \| p) \leq e^{-m\eta n} \text{KL}(q_0 \| p) + \frac{\epsilon}{2}. \quad (28)$$

When  $n \geq \frac{1}{m\eta} \log \frac{2\text{KL}(q_0 \| p)}{\epsilon}$ ,  $e^{-m\eta n} \text{KL}(q_0 \| p) \leq \frac{\epsilon}{2}$ , and therefore  $\text{KL}(q_n \| p) \leq \epsilon$ .

Plugging the setting of  $\eta$  gives us the upper bound for number of iterations:

$$n = 4 \frac{L^2}{m^2} \frac{d}{\epsilon} \log \frac{2\text{KL}(q_0 \| p)}{\epsilon} = \tilde{\mathcal{O}} \left( \frac{L^2}{m^2} \frac{d}{\epsilon} \right).$$

□

**Proof of Lemma 5** We prove Lemma 3 by induction. We first see that for the current choice of initialization,  $\mathbb{E}_{\theta \sim q_0} [\|\theta\|^2] \leq \frac{d}{m}$ . We then assume that  $\mathbb{E}_{\theta \sim q_n} [\|\theta\|^2] \leq \frac{d}{m}$  and prove that  $\mathbb{E}_{\theta \sim q_{n+1}} [\|\theta\|^2] \leq \frac{d}{m}$ .

We know that

$$\theta_{n+1} = \theta_n - \eta \nabla U(\theta_n) + \sqrt{2} (W_{\eta(n+1)} - W_{\eta n}).$$

To provide a bound on  $\|\theta_{n+1}\|$ , we first analyze the term:  $\theta_n - \eta \nabla U(\theta_n)$ . To this end, we construct a function:  $V(\theta) = \frac{1}{2} \|\theta\|^2 - \eta U(\theta)$  and prove that it is  $(1 - m\eta)$ -Lipschitz smooth. Since function  $U$  is assumed to be  $m$ -strongly convex,

$$\begin{aligned} \langle \nabla V(\theta) - \nabla V(\vartheta), \theta - \vartheta \rangle &= \langle (\theta - \vartheta) - \eta (\nabla U(\theta) - \nabla U(\vartheta)), \theta - \vartheta \rangle \\ &= \|\theta - \vartheta\|^2 - \eta \langle \nabla U(\theta) - \nabla U(\vartheta), \theta - \vartheta \rangle \\ &\leq (1 - m\eta) \|\theta - \vartheta\|^2. \end{aligned}$$

Therefore, function  $V(\theta) = \frac{1}{2} \|\theta\|^2 - \eta U(\theta)$  is  $(1 - m\eta)$ -Lipschitz smooth and satisfy  $\nabla V(0) = 0$ , which means:

$$\|\theta_n - \eta \nabla U(\theta_n)\| = \|\nabla V(\theta_n)\| \leq (1 - m\eta) \|\theta_n\|.$$

We are now in a position to bound  $\mathbb{E} \|\theta_{n+1}\|^2$ :

$$\begin{aligned} \mathbb{E} [\|\theta_{n+1}\|^2] &= \mathbb{E} \left[ \left\| \theta_n - \eta \nabla U(\theta_n) + \sqrt{2} (W_{\eta(n+1)} - W_{\eta n}) \right\|^2 \right] \\ &= \mathbb{E} [\|\theta_n - \eta \nabla U(\theta_n)\|^2] + 2\eta d \\ &\leq (1 - m\eta) \mathbb{E} [\|\theta_n\|^2] + 2\eta d \\ &= \mathbb{E} [\|\theta_n\|^2] + \eta (2d - m \mathbb{E} [\|\theta_n\|^2]). \end{aligned} \quad (29)$$

$$= \mathbb{E} [\|\theta_n\|^2] + \eta (2d - m \mathbb{E} [\|\theta_n\|^2]). \quad (30)$$

By the inductive hypothesis,  $\mathbb{E} [\|\theta_n\|^2] \leq \frac{4d}{m}$ . If  $\mathbb{E} [\|\theta_n\|^2] \geq \frac{2d}{m}$ , then  $(2d - m\mathbb{E} [\|\theta_n\|^2]) \leq 0$ ,  $\mathbb{E} [\|\theta_{n+1}\|^2] \leq \mathbb{E} [\|\theta_n\|^2] \leq \frac{4d}{m}$ . If  $\mathbb{E} [\|\theta_n\|^2] \leq \frac{2d}{m}$  instead, then we use line 29 and that  $\eta \leq \frac{1}{L}$  to obtain:  $\mathbb{E} \|\theta_{n+1}\|^2 \leq (1 - \frac{m}{L}) \frac{2d}{m} + \frac{2d}{L} \leq \frac{4d}{m}$ .

Therefore, we have proven that for any  $n > 0$ ,  $\mathbb{E}_{\theta \sim q_n} [\|\theta\|^2] \leq \frac{4d}{m}$  by induction. □
